# Supplementary material for: Controlled synthesis of flower-like cobalt phosphate microsheet arrays supported on Ni foam as a highly efficient 3D integrated anode for non-enzymatic glucose sensing
Source: Royal Society of Chemistry journal article supplement (doi:10.1039/c9qi00948e), 2019-10-15
Supplement: c9qi00948e1.pdf [file c9qi00948e1.pdf]

## Control synthesis of flower-like cobalt phosphate microsheet arrays supported on Ni foam as highly efficient 3D integrated anode for non-enzymatic glucose sensing

Xue Wang, Mingzhu Wang, Shiya Feng, Daiping He\* and Ping Jiang\*

*Chongqing Key Laboratory of Green Synthesis and Applications, College of Chemistry, Chongqing Normal University, Chongqing 401331, China*

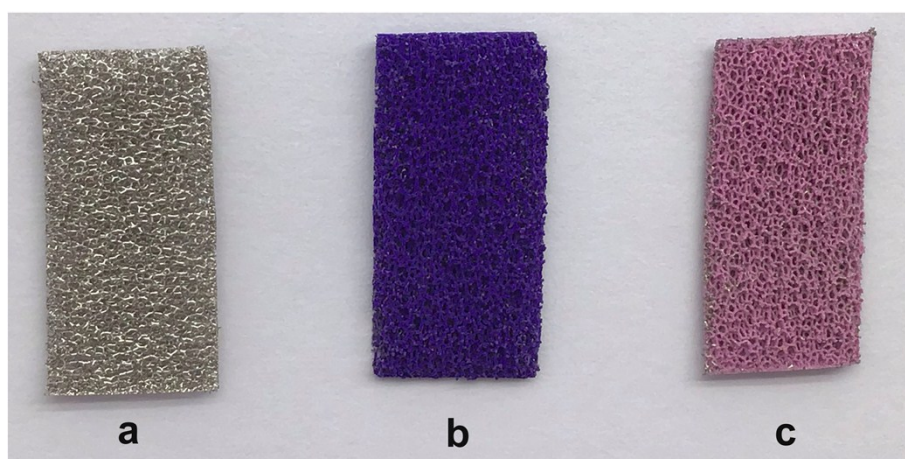

Fig. S1. Photographs of NF before (a) and after (b,c) control hydrothermal synthesis.

---

\* Corresponding author. Tel.: +86-23-65362777;

E-mail address: hedaiping@126.com

E-mail address: jphdp868@126.com

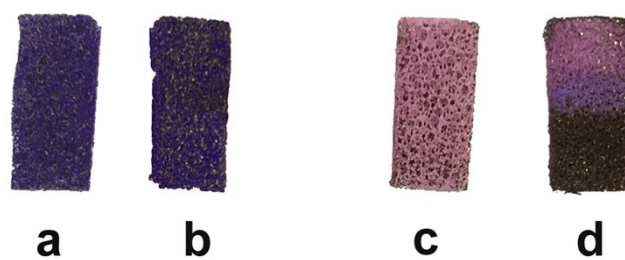

Fig. S2. Photographs of CoPO MA/NF before (a) and after (b) ten CVs cycles, and CoHPO MA/NF before (c) and after (d) ten CVs cycles.

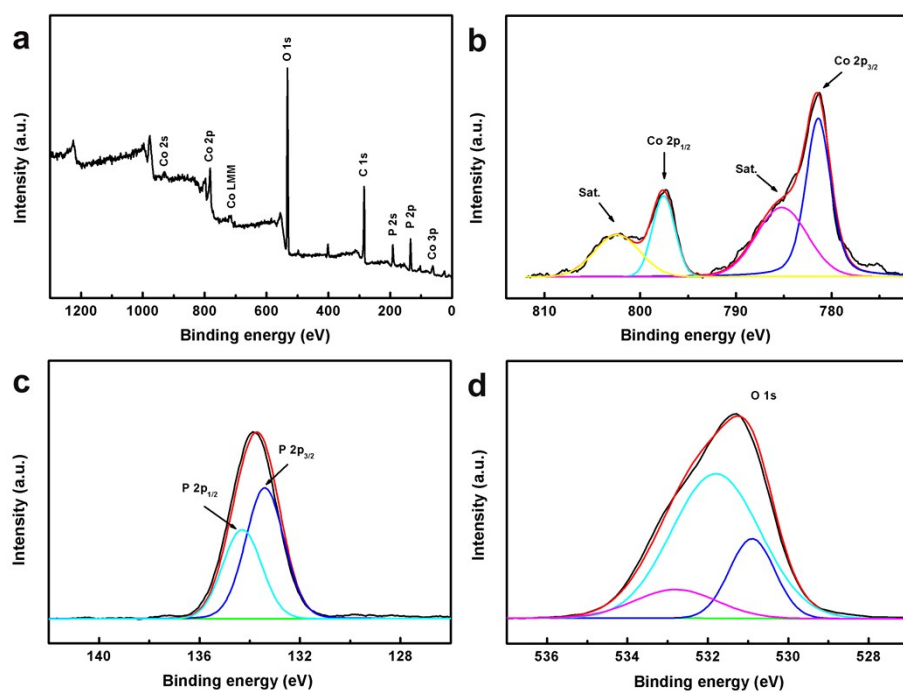

Fig. S3. (a) XPS survey spectra of the CoHPO MA/NF. (b-d) XPS spectra of Co 2p, P 2p and O 1s, respectively, for CoHPO MA/NF.

Table. S1. Recovery for glucose detection in human serum samples.

| Sample | Added glucose (mM) | Found glucose (mM) | Recovery (%) | RSD (n=3) |
|--------|--------------------|--------------------|--------------|-----------|
| 1      | 0.1                | 0.0989             | 98.9         | 3.02      |
| 2      | 0.2                | 0.2083             | 104.2        | 1.31      |
| 3      | 0.3                | 0.2960             | 98.7         | 2.55      |

Table. S2. Glucose concentration in human serum samples measured by the hospital and the present sensor

| Sample | Glucose concentration offered by<br>hospital (mM) | Glucose concentration determined<br>by the present sensor (mM) | RSD (%)<br>(n=3) | Bias (mM) |
|--------|---------------------------------------------------|----------------------------------------------------------------|------------------|-----------|
| 1      | 7.25                                              | 7.31                                                           | 1.27             | 0.06      |
| 2      | 5.61                                              | 5.51                                                           | 2.26             | -0.10     |
| 3      | 11.08                                             | 11.04                                                          | 1.91             | -0.04     |
